# Supplementary material for: Osteonecrosis in Korean Paediatric and Young Adults with Acute Lymphoblastic Leukaemia or Lymphoblastic Lymphoma: A Nationwide Epidemiological Study
Source: MDPI journal article supplement (doi:10.3390/jcm11092489), 2022-04-28
Supplement: s1 [file s1]

## Supplementary Materials

**Table S1.** Risk factors of avascular necrosis (young adult group).

| Risk Factors            |                               | ALL                            |                                |                   | Young Adult Group (n=1517)     |                                |                   |
|-------------------------|-------------------------------|--------------------------------|--------------------------------|-------------------|--------------------------------|--------------------------------|-------------------|
|                         |                               | No AVN<br>(n=4703)             | AVN<br>(n=158)                 | <i>p</i> -value * | No AVN<br>(n=1452)             | AVN<br>(n=65)                  | <i>p</i> -value * |
|                         |                               | Median<br>(Q1, Q3)<br>or n (%) | Median<br>(Q1, Q3)<br>or n (%) |                   | Median<br>(Q1, Q3)<br>or n (%) | Median<br>(Q1, Q3)<br>or n (%) |                   |
| Age                     |                               | 12 (4, 23)                     | 17 (13, 26)                    | <0.001            | 29 (20, 39)                    | 28 (20, 39)                    | 0.121             |
| Sex                     | Male                          | 2800<br>(97.05)                | 85<br>(2.95)                   | 0.149             | 873<br>(95.72)                 | 39<br>(4.28)                   | 0.984             |
| Radiotherapy            | Yes                           | 944<br>(94.87)                 | 51<br>(5.13)                   | <0.001            | 497<br>(95.39)                 | 24<br>(4.61)                   | 0.655             |
| HSCT                    | Yes                           | 1329<br>(95.41)                | 64<br>(4.59)                   | <0.001            | 792<br>(95.08)                 | 41<br>(4.92)                   | 0.176             |
| Steroid use**           | Dexamethasone                 | 1074<br>(96.67)                | 37<br>(3.33)                   | 0.141             | 543<br>(95.77)                 | 24<br>(4.23)                   | 0.399             |
|                         | Prednisone                    | 1953<br>(96.68)                | 67<br>(3.32)                   |                   | 334<br>(94.35)                 | 20<br>(5.65)                   |                   |
|                         | Dexamethasone<br>+ Prednisone | 1144<br>(96.22)                | 45<br>(3.78)                   |                   | 392<br>(96.08)                 | 16<br>(3.92)                   |                   |
|                         | Not used                      | 532<br>(98.34)                 | 9<br>(1.66)                    |                   | 183<br>(97.34)                 | 5<br>(2.66)                    |                   |
| Asparaginase<br>use     | Yes                           | 3205<br>(96.59)                | 113<br>(3.41)                  | 0.371             | 583<br>(94.80)                 | 32<br>(5.20)                   | 0.145             |
| Anthracycline<br>use ** | Yes                           | 3020<br>(95.90)                | 129<br>(4.10)                  | <0.001            | 1153<br>(95.37)                | 56<br>(4.63)                   | 0.190             |

\*Wilcoxon rank sum test; HSCT, hematopoietic stem cell transplantation; \*\*during 1<sup>st</sup> 60 days after diagnosis

**Table S2.** Univariate and multivariate analysis associated with AVN (young adult group).

| Risk Factors |          | Median (Q1, Q3)<br>or n (%) | Univariate              |                          | Multivariate<br>_ON     |                          | Multivariate_Death   |                          |
|--------------|----------|-----------------------------|-------------------------|--------------------------|-------------------------|--------------------------|----------------------|--------------------------|
|              |          |                             | HR<br>(95% CI)          | <i>p</i> -<br>value<br>* | HR<br>(95%<br>CI)       | <i>p</i> -<br>value<br>* | HR<br>(95% CI)       | <i>p</i> -<br>value<br>* |
| Age          |          | 29 (20.39)                  | 0.970<br>(0.930, 1.012) | 0.162                    | 0.972<br>(0.931, 1.015) | 0.196                    | 1.018 (1.003, 1.033) | 0.018                    |
| Sex          | Male     | 912<br>(60.12)              | 1.068<br>(0.650, 1.755) | 0.795                    | 1.000<br>(0.606, 1.651) | 0.999                    | 1.086 (0.911, 1.295) | 0.359                    |
| Radiotherapy | Yes      | 521<br>(34.34)              | 1.290<br>(0.772, 2.154) | 0.331                    | 1.019<br>(0.575, 1.804) | 0.949                    | 1.239 (1.012, 1.517) | 0.038                    |
| HSCT         | Yes      | 833<br>(54.91)              | 1.638<br>(0.963, 2.787) | 0.069                    | 1.324<br>(0.718, 2.442) | 0.369                    | 1.193 (0.965, 1.474) | 0.103                    |
| Steroid      | Dexameth | 567                         | 2.664 (1.011,           | 0.047                    | 1.846                   | 0.3                      | 2.113 (1.407,        | <0.001                   |

|                      |                              |             |                      |       |                      |       |                      |        |
|----------------------|------------------------------|-------------|----------------------|-------|----------------------|-------|----------------------|--------|
| use**                | asone                        | (37.38)     | 7.017)               |       | (0.564, 6.045)       | 11    | 4.174)               |        |
|                      | Prednison e                  | 354 (23.34) | 2.810 (1.051, 7.508) | 0.039 | 1.687 (0.506, 5.618) | 0.395 | 1.277 (0.831, 1.962) | 0.266  |
|                      | Dexameth asone + Prednison e | 408 (26.90) | 2.647 (0.965, 7.263) | 0.059 | 1.620 (0.470, 5.578) | 0.445 | 1.685 (1.099, 2.584) | 0.017  |
|                      | Not used                     | 188 (12.39) | 1 (ref)              |       | 1 (ref)              |       |                      |        |
| Asparagi nase use    | Yes                          | 615 (40.54) | 1.783 (1.094, 2.908) | 0.020 | 1.510 (0.862, 2.644) | 0.150 | 1.964 (1.622, 2.377) | <0.001 |
| Anthracy cline Use** | Yes                          | 308 (20.30) | 2.316 (1.141, 4.698) | 0.020 | 1.287 (0.514, 3.219) | 0.590 | 1.056 (0.784, 1.423) | 0.720  |

\* Wilcoxon rank sum test; HSCT, hematopoietic stem cell transplantation; \*\* during 1<sup>st</sup> 60 days after diagnosis.
